# Supplementary material for: Mapping the Intramolecular Communications among Different Glutamate Dehydrogenase States Using Molecular Dynamics
Source: MDPI journal article supplement (doi:10.3390/biom11060798), 2021-05-27
Supplement: s1 [file s1]

## Supporting Information

# Mapping the Intramolecular Communications Among Different Glutamate Dehydrogenase States using Molecular Dynamics

Shaherin Basith<sup>1</sup>, Balachandran Manavalan<sup>1</sup>, Tae Hwan Shin<sup>1</sup>, and Gwang Lee<sup>1,2,\*</sup>

<sup>1</sup>Department of Physiology, Ajou University School of Medicine, Suwon, Republic of Korea; shaherinb@gmail.com, bala@ajou.ac.kr

<sup>2</sup>Department of Molecular Science and Technology, Ajou University, Suwon, Republic of Korea; glee@ajou.ac.kr

\*Corresponding author: Gwang Lee

Professor, Department of Physiology

Ajou University School of Medicine, 164, World cup-ro,

Yeongtong-gu, Suwon, 16499, Republic of Korea.

Tel: +82-31-219-4554

Fax: +82-31-219-5049

E-mail: glee@ajou.ac.kr

## Supplementary Figure 1

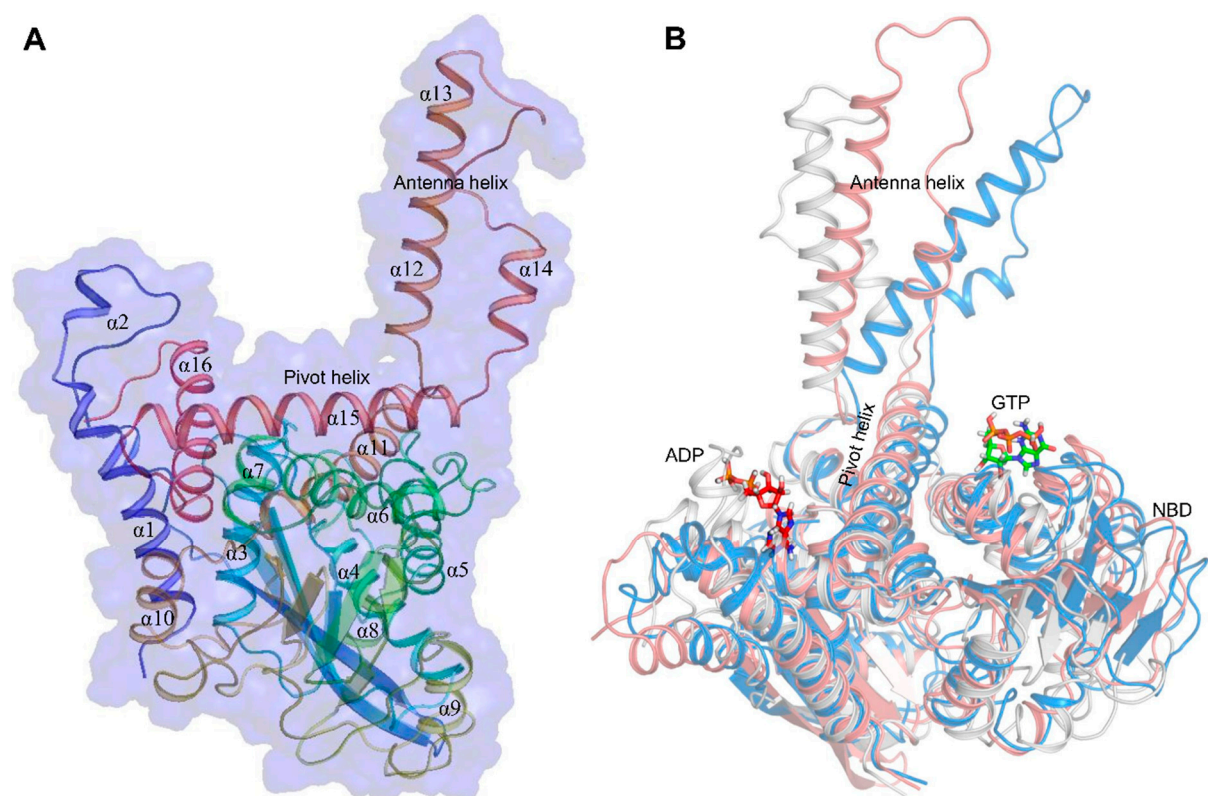

**Figure S1.** Structural architecture and superposition of GDH monomer structure. (A) Sixteen  $\alpha$ -helices including intermediate, elongated, antenna, and pivot helices, and conserved nucleotide-binding domain (NBD) is shown. (B) The minimum energy structures of GDH in the apo, agonist- and antagonist-bound forms are superimposed to show that the most significant differences among the three forms is in the ligand binding regions, NBD, intermediate helix ( $\alpha 6$ ), elongated helix ( $\alpha 11$ ), antenna helices, and pivot helix.
