# Supplementary material for: Mapping the Intramolecular Communications among Different Glutamate Dehydrogenase States Using Molecular Dynamics
Source: Biomolecules. 2021 May 27;11(6):798. doi: 10.3390/biom11060798 (PMC8228935; doi:10.3390/biom11060798)
Supplement: Supplementary file 1 [file biomolecules-11-00798-s001.zip]

Archive with 4 entries (4 files):
- biomolecules-1205428 suppl orig.pdf
- M1_Supporting_Movie.mpg
- M2_Supporting_Movie.mpg
- M3_Supporting_Movie.mpg
